# Supplementary material
Source: publisher site journal article supplement (https://www.dovepress.com/get_supplementary_file.php?f=325720.xlsx)
Supplement: Supplementary file 1 [file get_supplementary_file.php]

## Sheet: 07new.clinical.data
	case_submitter_id	Age	Gender	vital_status	M	N	Stage	T	time	status	NDC1	Group
1	TCGA-3L-AA1B	61	female	Alive	M0	N0	I	T2	475	0	3.28507	Low
2	TCGA-4N-A93T	67	male	Alive	M0	N1	III	T4	146	0	2.29758	Low
3	TCGA-4T-AA8H	42	female	Alive	M0	N0	II	T3	385	0	3.54367	Low
4	TCGA-5M-AAT4	74	male	Dead	M1	N0	IV	T3	49	1	3.74484	Low
5	TCGA-5M-AAT6	40	female	Dead	M1	N2	IV	T4	290	1	3.97358	High
6	TCGA-5M-AATE	76	male	Alive	M0	N0	II	T3	1200	0	3.88597	High
7	TCGA-A6-2671	85	male	Dead	M1	N2	IV	T3	1331	1	3.39733	Low
8	TCGA-A6-2672	82	female	Alive	M0	N1	III	T3	1419	0	3.755	Low
9	TCGA-A6-2674	71	male	Alive	M1	N2	IV	T3	1331	0	3.83751	High
10	TCGA-A6-2675	78	male	Alive	M0	N0	II	T3	1321	0	3.42478	Low
11	TCGA-A6-2676	75	female	Dead	M0	N0	II	T4	1305	1	4.48691	High
12	TCGA-A6-2677	68	female	Dead	M0	N2	III	T3	740	1	5.01491	High
13	TCGA-A6-2678	43	female	Alive	M0	N1	III	T3	1286	0	4.25234	High
14	TCGA-A6-2679	73	female	Alive	M0	N0	II	T3	1366	0	1.3933	Low
15	TCGA-A6-2680	72	female	Alive	M0	N0	II	T3	1068	0	3.07711	Low
16	TCGA-A6-2681	73	female	Alive	M0	N0	II	T3	1387	0	2.69237	Low
17	TCGA-A6-2682	70	male	Dead	M1	N1	IV	T4	424	1	3.56605	Low
18	TCGA-A6-2683	57	female	Dead	M1	N0	IV	T4	504	1	1.57713	Low
19	TCGA-A6-2684	75	female	Alive	M0	N0	I	T2	1127	0	4.02336	High
20	TCGA-A6-2685	48	female	Alive	M0	N0	II	T3	1133	0	2.27655	Low
21	TCGA-A6-2686	81	female	Dead	M0	N0	II	T3	1126	1	3.37637	Low
22	TCGA-A6-3807	53	female	Alive	M0	N2	III	T3	1054	0	4.09014	High
23	TCGA-A6-3808	73	male	Alive	M0	N0	II	T3	1014	0	4.26534	High
24	TCGA-A6-3809	71	female	Alive	M0	N0	II	T4	996	0	4.61058	High
25	TCGA-A6-3810	62	male	Alive	M0	N0	II	T3	1111	0	3.66532	Low
26	TCGA-A6-4105	79	male	Dead	M0	N0	II	T3	442	1	3.7621	Low
27	TCGA-A6-4107	57	female	Alive	M0	N1	III	T3	987	0	3.47187	Low
28	TCGA-A6-5656	74	male	Alive	M0	N0	I	T2	1001	0	4.16743	High
29	TCGA-A6-5657	65	male	Alive	M0	N1	III	T3	962	0	4.15515	High
30	TCGA-A6-5659	82	male	Alive	M0	N0	I	T2	926	0	4.03153	High
31	TCGA-A6-5660	73	male	Alive	M0	N2	III	T3	888	0	3.42717	Low
32	TCGA-A6-5661	80	female	Alive	M0	N0	II	T3	1020	0	2.36302	Low
33	TCGA-A6-5662	46	male	Alive	M1	N2	IV	T3	718	0	2.48879	Low
34	TCGA-A6-5664	80	male	Alive	M0	N2	III	T4	672	0	3.83422	High
35	TCGA-A6-5665	84	female	Alive	M0	N0	II	T3	671	0	3.36361	Low
36	TCGA-A6-5666	78	male	Alive	M0	N0	II	T4	995	0	4.31442	High
37	TCGA-A6-5667	40	female	Alive	M0	N1	III	T3	887	0	3.69084	Low
38	TCGA-A6-6137	55	male	Alive	M0	N1	III	T3	824	0	3.90842	High
39	TCGA-A6-6138	61	male	Alive	M0	N0	I	T2	685	0	3.73556	Low
40	TCGA-A6-6140	62	male	Alive	M0	N0	II	T3	734	0	3.9934	High
41	TCGA-A6-6141	31	male	Alive	M0	N0	II	T3	255	0	3.59419	Low
42	TCGA-A6-6142	56	female	Alive	M1	N1	IV	T3	763	0	3.24611	Low
43	TCGA-A6-6648	56	male	Alive	M1	N0	IV	T3	766	0	5.06654	High
44	TCGA-A6-6649	66	male	Alive	M0	N1	III	T3	735	0	4.03145	High
45	TCGA-A6-6650	69	female	Alive	M0	N0	II	T3	627	0	4.44448	High
46	TCGA-A6-6651	55	female	Alive	M0	N1	III	T3	662	0	3.09333	Low
47	TCGA-A6-6652	59	male	Alive	M1	N0	IV	T3	751	0	3.80825	High
48	TCGA-A6-6653	82	male	Alive	M0	N0	I	T2	742	0	4.1398	High
49	TCGA-A6-6654	65	female	Alive	M0	N1	III	T3	726	0	2.99495	Low
50	TCGA-A6-6780	74	male	Alive	M0	N0	II	T3	612	0	4.92123	High
51	TCGA-A6-6781	43	male	Alive	M0	N1	III	T4	598	0	3.35059	Low
52	TCGA-A6-6782	82	male	Alive	M0	N0	II	T4	617	0	3.33953	Low
53	TCGA-A6-A565	34	female	Dead	M0	N2	III	T3	494	1	3.28837	Low
54	TCGA-A6-A566	55	female	Dead	M0	N1	III	T4	758	1	3.39238	Low
55	TCGA-A6-A567	56	male	Dead	M1	N1	IV	T3	1881	1	3.7737	Low
56	TCGA-A6-A56B	57	male	Dead	M0	N1	III	T3	1711	1	4.04676	High
57	TCGA-A6-A5ZU	59	male	Alive	M0	N1	III	T3	293	0	3.01067	Low
58	TCGA-AA-3488	58	male	Dead	M1	N2	IV	T3	153	1	2.95456	Low
59	TCGA-AA-3489	75	male	Dead	M0	N0	II	T3	214	1	3.7712	Low
60	TCGA-AA-3492	90	female	Dead	M0	N0	II	T3	1	1	3.27714	Low
61	TCGA-AA-3494	55	male	Alive	M1	N0	IV	T3	31	0	3.91262	High
62	TCGA-AA-3495	79	male	Alive	M0	N0	I	T2	1127	0	4.50353	High
63	TCGA-AA-3496	83	female	Alive	M0	N0	II	T3	31	0	3.79011	High
64	TCGA-AA-3502	73	male	Alive	M0	N0	I	T2	1065	0	3.58377	Low
65	TCGA-AA-3506	77	male	Alive	M0	N0	I	T2	1765	0	3.09159	Low
66	TCGA-AA-3509	54	female	Alive	M0	N0	II	T3	1915	0	3.55906	Low
67	TCGA-AA-3510	70	male	Alive	M0	N0	II	T3	1946	0	3.11173	Low
68	TCGA-AA-3511	64	male	Alive	M0	N0	II	T4	212	0	3.72477	Low
69	TCGA-AA-3514	81	female	Alive	M0	N0	I	T2	31	0	2.27162	Low
70	TCGA-AA-3516	74	female	Dead	M0	N2	III	T3	396	1	4.24876	High
71	TCGA-AA-3517	60	male	Alive	M0	N0	II	T3	1186	0	2.8445	Low
72	TCGA-AA-3518	81	female	Alive	M0	N0	II	T3	31	0	4.05664	High
73	TCGA-AA-3519	63	male	Alive	M0	N1	III	T3	276	0	3.74914	Low
74	TCGA-AA-3520	86	female	Alive	M0	N0	II	T3	731	0	4.04763	High
75	TCGA-AA-3522	67	male	Alive	M0	N0	II	T3	1127	0	3.5907	Low
76	TCGA-AA-3524	85	male	Alive	M0	N0	II	T3	1096	0	4.91522	High
77	TCGA-AA-3525	90	male	Alive	M0	N1	III	T3	1	0	3.86089	High
78	TCGA-AA-3526	57	male	Alive	M0	N0	I	T2	580	0	4.23905	High
79	TCGA-AA-3527	90	female	Alive	M0	N0	II	T3	0	0	1.74002	Low
80	TCGA-AA-3529	78	female	Dead	M0	N2	III	T3	0	1	3.91433	High
81	TCGA-AA-3530	80	male	Alive	M0	N0	I	T2	580	0	4.23196	High
82	TCGA-AA-3531	75	female	Alive	M0	N0	II	T3	1035	0	2.39059	Low
83	TCGA-AA-3532	63	male	Alive	M0	N0	II	T3	882	0	4.21064	High
84	TCGA-AA-3534	78	female	Alive	M0	N0	II	T3	882	0	4.08737	High
85	TCGA-AA-3538	54	female	Alive	M0	N0	I	T2	791	0	4.26131	High
86	TCGA-AA-3542	69	male	Alive	M0	N2	III	T3	395	0	2.78764	Low
87	TCGA-AA-3543	84	male	Alive	M0	N0	I	T2	30	0	3.80068	High
88	TCGA-AA-3544	68	male	Alive	M0	N0	I	T2	426	0	3.83569	High
89	TCGA-AA-3548	71	female	Alive	M0	N2	III	T3	1034	0	3.65758	Low
90	TCGA-AA-3549	69	male	Alive	M0	N0	I	T2	639	0	4.00877	High
91	TCGA-AA-3552	85	male	Dead	M0	N2	III	T3	396	1	3.7374	Low
92	TCGA-AA-3553	61	female	Alive	M0	N0	I	T2	730	0	4.35169	High
93	TCGA-AA-3554	62	female	Alive	M0	N0	II	T3	546	0	4.05322	High
94	TCGA-AA-3555	81	female	Alive	M0	N0	II	T3	911	0	4.54554	High
95	TCGA-AA-3556	78	male	Alive	M0	N0	I	T2	700	0	4.47728	High
96	TCGA-AA-3560	72	female	Alive	M0	N2	III	T3	608	0	3.36075	Low
97	TCGA-AA-3561	72	male	Alive	M0	N0	II	T3	424	0	4.26835	High
98	TCGA-AA-3562	82	male	Alive	M0	N2	III	T3	608	0	3.9272	High
99	TCGA-AA-3655	68	male	Alive	M0	N0	II	T3	1856	0	4.41104	High
100	TCGA-AA-3660	51	female	Alive	M0	N0	II	T3	2375	0	4.05079	High
101	TCGA-AA-3662	80	female	Alive	M1	N2	IV	T4	184	0	3.8852	High
102	TCGA-AA-3663	42	male	Alive	M0	N0	II	T3	212	0	4.39602	High
103	TCGA-AA-3664	74	female	Alive	M0	N0	II	T3	1643	0	4.54195	High
104	TCGA-AA-3666	68	male	Dead	M0	N1	III	T3	61	1	4.3494	High
105	TCGA-AA-3667	36	female	Alive	M0	N0	I	T2	426	0	2.64554	Low
106	TCGA-AA-3672	90	female	Alive	M0	N1	III	T3	0	0	2.43942	Low
107	TCGA-AA-3673	53	female	Alive	M0	N0	II	T3	1522	0	4.04673	High
108	TCGA-AA-3675	84	male	Alive	M0	N0	II	T3	1431	0	3.76913	Low
109	TCGA-AA-3678	60	female	Alive	M0	N1	III	T2	1430	0	4.03354	High
110	TCGA-AA-3679	59	male	Alive	M1	N2	IV	T3	457	0	3.37009	Low
111	TCGA-AA-3680	67	female	Dead	M1	N2	IV	T4	335	1	3.91971	High
112	TCGA-AA-3681	77	female	Alive	M0	N1	III	T3	182	0	4.07032	High
113	TCGA-AA-3684	65	female	Alive	M1	N2	IV	T4	0	0	2.27639	Low
114	TCGA-AA-3685	69	male	Alive	M0	N0	II	T3	1127	0	3.60869	Low
115	TCGA-AA-3688	80	male	Alive	M1	N1	IV	T3	578	0	4.25023	High
116	TCGA-AA-3692	47	female	Dead	M1	N2	IV	T3	1095	1	4.24876	High
117	TCGA-AA-3693	77	female	Alive	M1	N1	IV	T4	0	0	3.85968	High
118	TCGA-AA-3696	75	female	Dead	M1	N1	IV	T3	153	1	3.9869	High
119	TCGA-AA-3697	77	male	Alive	M0	N0	II	T3	2587	0	3.92538	High
120	TCGA-AA-3710	80	female	Alive	M0	N0	II	T3	821	0	4.01333	High
121	TCGA-AA-3712	65	male	Alive	M0	N2	III	T3	0	0	3.76955	Low
122	TCGA-AA-3713	68	male	Alive	M1	N0	IV	T3	579	0	4.44993	High
123	TCGA-AA-3715	77	male	Dead	M0	N0	II	T3	579	1	2.5991	Low
124	TCGA-AA-3811	84	female	Dead	M0	N2	III	T3	306	1	3.87731	High
125	TCGA-AA-3812	82	female	Alive	M0	N0	II	T3	1066	0	1.61807	Low
126	TCGA-AA-3814	85	female	Alive	M0	N0	II	T3	0	0	3.60742	Low
127	TCGA-AA-3815	65	female	Alive	M0	N0	II	T3	1005	0	4.1188	High
128	TCGA-AA-3818	78	female	Dead	M0	N0	II	T3	30	1	3.84348	High
129	TCGA-AA-3819	41	female	Alive	M0	N0	II	T3	761	0	4.20694	High
130	TCGA-AA-3821	81	female	Alive	M0	N0	I	T2	31	0	4.29541	High
131	TCGA-AA-3831	66	male	Alive	M0	N0	II	T3	547	0	4.39598	High
132	TCGA-AA-3833	63	female	Alive	M0	N0	II	T3	485	0	3.58592	Low
133	TCGA-AA-3837	67	male	Alive	M0	N0	II	T3	1186	0	3.27379	Low
134	TCGA-AA-3841	66	male	Alive	M0	N0	II	T3	1124	0	2.18159	Low
135	TCGA-AA-3842	51	male	Alive	M0	N1	III	T2	1126	0	4.31555	High
136	TCGA-AA-3844	78	female	Alive	M0	N2	III	T3	454	0	3.74755	Low
137	TCGA-AA-3845	86	female	Dead	M0	N0	II	T3	0	1	3.8853	High
138	TCGA-AA-3846	74	female	Alive	M0	N0	II	T3	518	0	4.2204	High
139	TCGA-AA-3848	82	female	Dead	M0	N2	III	T3	306	1	2.27891	Low
140	TCGA-AA-3850	74	male	Dead	M0	N0	I	T2	0	1	3.63148	Low
141	TCGA-AA-3851	74	male	Alive	M0	N0	II	T3	1006	0	3.49982	Low
142	TCGA-AA-3852	88	male	Dead	M0	N0	II	T3	0	1	3.93092	High
143	TCGA-AA-3854	71	female	Alive	M0	N0	I	T2	1096	0	3.85462	High
144	TCGA-AA-3855	72	male	Alive	M0	N0	I	T2	975	0	3.6	Low
145	TCGA-AA-3856	59	male	Alive	M0	N0	II	T3	30	0	3.9485	High
146	TCGA-AA-3858	67	male	Alive	M0	N0	I	T2	945	0	4.41744	High
147	TCGA-AA-3860	53	female	Alive	M0	N1	III	T3	945	0	3.11928	Low
148	TCGA-AA-3861	72	male	Alive	M0	N0	II	T3	914	0	3.93057	High
149	TCGA-AA-3862	82	male	Alive	M0	N0	II	T3	914	0	3.73325	Low
150	TCGA-AA-3864	71	male	Alive	M0	N0	II	T3	1612	0	5.09127	High
151	TCGA-AA-3866	78	female	Alive	M0	N0	I	T2	518	0	3.91293	High
152	TCGA-AA-3867	74	male	Alive	M1	N2	IV	T3	731	0	3.20153	Low
153	TCGA-AA-3869	76	male	Dead	M1	N2	IV	T4	822	1	4.10482	High
154	TCGA-AA-3870	71	female	Alive	M1	N2	IV	T3	912	0	3.23839	Low
155	TCGA-AA-3872	45	male	Alive	M1	N2	IV	T4	0	0	3.25687	Low
156	TCGA-AA-3875	78	female	Alive	M0	N0	I	T1	549	0	4.44467	High
157	TCGA-AA-3877	83	female	Alive	M0	N0	I	T1	943	0	4.18978	High
158	TCGA-AA-3930	66	male	Dead	M1	N2	IV	T3	61	1	4.19221	High
159	TCGA-AA-3939	83	male	Alive	M0	N0	II	T3	395	0	3.58576	Low
160	TCGA-AA-3941	84	female	Alive	M1	N1	IV	T4	730	0	4.05438	High
161	TCGA-AA-3947	60	female	Alive	M0	N0	II	T4	1004	0	5.11316	High
162	TCGA-AA-3949	87	female	Alive	M0	N1	III	T3	791	0	4.41788	High
163	TCGA-AA-3950	79	female	Alive	M0	N0	II	T3	730	0	4.67999	High
164	TCGA-AA-3952	68	male	Dead	M0	N2	III	T3	61	1	3.88549	High
165	TCGA-AA-3955	38	male	Alive	M0	N2	III	T2	638	0	4.62351	High
166	TCGA-AA-3956	65	male	Alive	M0	N0	II	T3	1035	0	3.97	High
167	TCGA-AA-3966	89	female	Alive	M0	N0	II	T3	61	0	3.80687	High
168	TCGA-AA-3968	55	female	Alive	M0	N0	I	T2	669	0	4.04275	High
169	TCGA-AA-3970	65	male	Alive	M0	N0	II	T3	1096	0	4.43197	High
170	TCGA-AA-3971	58	male	Alive	M0	N1	III	T3	489	0	3.86023	High
171	TCGA-AA-3972	72	male	Alive	M1	N1	IV	T3	1551	0	4.31459	High
172	TCGA-AA-3973	69	male	Alive	M1	N1	IV	T4	397	0	2.85047	Low
173	TCGA-AA-3975	80	male	Alive	M0	N0	I	T2	1036	0	3.55815	Low
174	TCGA-AA-3976	70	male	Alive	M0	N1	III	T2	791	0	4.27584	High
175	TCGA-AA-3979	84	male	Alive	M0	N0	II	T3	730	0	4.8216	High
176	TCGA-AA-3980	89	female	Alive	M0	N0	I	T2	242	0	4.48116	High
177	TCGA-AA-3982	75	male	Alive	M0	N1	III	T3	822	0	4.26837	High
178	TCGA-AA-3984	61	female	Alive	M0	N0	II	T3	0	0	4.9686	High
179	TCGA-AA-3986	73	male	Alive	M0	N0	I	T2	580	0	4.02982	High
180	TCGA-AA-3989	84	male	Dead	M1	N2	IV	T3	242	1	3.18585	Low
181	TCGA-AA-3994	69	male	Alive	M0	N1	III	T3	822	0	3.30694	Low
182	TCGA-AA-A004	76	male	Alive	M0	N0	II	T3	424	0	1.44279	Low
183	TCGA-AA-A00A	80	male	Alive	M0	N0	II	T3	1157	0	3.69701	Low
184	TCGA-AA-A00D	70	male	Alive	M0	N0	I	T2	578	0	4.00163	High
185	TCGA-AA-A00E	65	male	Alive	M0	N0	II	T3	913	0	4.0776	High
186	TCGA-AA-A00F	66	male	Alive	M0	N2	III	T3	1035	0	3.22473	Low
187	TCGA-AA-A00J	80	male	Alive	M0	N1	III	T4	549	0	3.9485	High
188	TCGA-AA-A00K	79	male	Alive	M0	N0	II	T3	549	0	3.85681	High
189	TCGA-AA-A00L	66	male	Alive	M0	N0	II	T3	1157	0	3.81494	High
190	TCGA-AA-A00N	75	male	Dead	M0	N0	II	T4	122	1	3.84489	High
191	TCGA-AA-A00O	83	female	Alive	M0	N2	III	T3	822	0	3.08851	Low
192	TCGA-AA-A00Q	66	female	Alive	M0	N1	III	T4	1278	0	2.84886	Low
193	TCGA-AA-A00R	64	female	Alive	M0	N0	I	T2	30	0	4.38151	High
194	TCGA-AA-A00U	50	male	Alive	M0	N1	III	T3	518	0	4.25359	High
195	TCGA-AA-A00W	80	male	Alive	M0	N0	I	T1	456	0	3.74927	Low
196	TCGA-AA-A00Z	70	male	Alive	M0	N0	II	T3	669	0	4.11977	High
197	TCGA-AA-A010	46	female	Alive	M0	N0	II	T4	1064	0	3.87452	High
198	TCGA-AA-A017	57	female	Alive	M0	N0	II	T3	457	0	3.59619	Low
199	TCGA-AA-A01C	75	male	Alive	M0	N1	III	T2	457	0	3.21889	Low
200	TCGA-AA-A01D	47	female	Dead	M0	N2	III	T3	334	1	3.90841	High
201	TCGA-AA-A01F	72	male	Alive	M0	N1	III	T3	974	0	3.17484	Low
202	TCGA-AA-A01G	63	male	Alive	M0	N0	II	T3	365	0	4.26285	High
203	TCGA-AA-A01I	76	male	Alive	M0	N0	I	T2	943	0	3.80508	High
204	TCGA-AA-A01K	74	female	Alive	M0	N2	III	T3	943	0	3.34571	Low
205	TCGA-AA-A01P	80	female	Dead	M0	N1	III	T3	1158	1	3.60795	Low
206	TCGA-AA-A01Q	48	female	Alive	M0	N0	II	T3	31	0	3.52333	Low
207	TCGA-AA-A01R	47	male	Alive	M0	N2	III	T3	1065	0	3.43207	Low
208	TCGA-AA-A01S	47	female	Alive	M0	N1	III	T3	31	0	3.67648	Low
209	TCGA-AA-A01T	63	female	Alive	M0	N1	III	T3	1005	0	1.91829	Low
210	TCGA-AA-A01V	59	male	Alive	M0	N0	I	T2	31	0	3.19929	Low
211	TCGA-AA-A01X	80	female	Alive	M0	N1	III	T2	791	0	2.60658	Low
212	TCGA-AA-A01Z	68	male	Alive	M0	N0	II	T3	1126	0	3.53284	Low
213	TCGA-AA-A022	88	female	Alive	M0	N0	II	T4	0	0	2.37214	Low
214	TCGA-AA-A024	81	male	Dead	M0	N0	II	T3	1188	1	3.00288	Low
215	TCGA-AA-A029	67	male	Alive	M0	N0	II	T3	1581	0	3.55821	Low
216	TCGA-AA-A02E	82	female	Dead	M1	N1	IV	T3	90	1	3.53606	Low
217	TCGA-AA-A02F	68	female	Alive	M1	N1	IV	T3	1216	0	4.34138	High
218	TCGA-AA-A02H	74	female	Dead	M1	N2	IV	T3	61	1	3.07908	Low
219	TCGA-AA-A02J	70	female	Dead	M1	N0	IV	T3	153	1	4.46807	High
220	TCGA-AA-A02K	50	male	Dead	M1	N2	IV	T4	426	1	3.77811	Low
221	TCGA-AA-A02O	82	male	Alive	M0	N0	II	T3	28	0	2.96963	Low
222	TCGA-AA-A02R	84	female	Dead	M0	N0	II	T3	670	1	4.12077	High
223	TCGA-AA-A02W	73	female	Alive	M0	N0	I	T2	1247	0	4.1278	High
224	TCGA-AA-A02Y	73	male	Alive	M0	N0	I	T2	1216	0	3.38229	Low
225	TCGA-AA-A03F	90	female	Dead	M0	N2	III	T3	0	1	2.11249	Low
226	TCGA-AA-A03J	65	female	Alive	M0	N0	I	T2	1246	0	2.4199	Low
227	TCGA-AD-5900	67	male	Alive	M0	N0	I	T2	370	0	4.12221	High
228	TCGA-AD-6548	81	female	Alive	M0	N0	I	T2	650	0	4.42705	High
229	TCGA-AD-6888	73	male	Dead	M0	N1	III	T3	472	1	3.54686	Low
230	TCGA-AD-6889	76	male	Dead	M0	N0	II	T3	2532	1	3.58559	Low
231	TCGA-AD-6895	84	male	Alive	M0	N1	III	T3	763	0	3.70717	Low
232	TCGA-AD-6899	84	male	Dead	M0	N2	III	T4	176	1	3.34099	Low
233	TCGA-AD-6965	62	male	Alive	M0	N2	III	T4	805	0	3.90868	High
234	TCGA-AD-A5EJ	74	female	Alive	M0	N0	II	T3	0	0	4.41062	High
235	TCGA-AD-A5EK	51	male	Alive	M0	N0	I	T2	500	0	3.78649	Low
236	TCGA-AM-5820	59	female	Alive	M1	N2	IV	T4	14	0	4.39188	High
237	TCGA-AM-5821	68	female	Alive	M0	N0	II	T3	28	0	4.06587	High
238	TCGA-AU-3779	80	female	Alive	M0	N0	II	T3	441	0	3.32167	Low
239	TCGA-AU-6004	69	female	Alive	M0	N0	I	T2	824	0	3.88053	High
240	TCGA-AY-4070	50	female	Dead	M0	N2	III	T3	496	1	3.32618	Low
241	TCGA-AY-4071	63	female	Dead	M0	N0	I	T1	29	1	2.79535	Low
242	TCGA-AY-5543	65	female	Alive	M1	N1	IV	T3	1004	0	3.5114	Low
243	TCGA-AY-6196	47	male	Alive	M0	N2	III	T3	6	0	2.54892	Low
244	TCGA-AY-6197	60	male	Alive	M0	N0	II	T3	652	0	4.21989	High
245	TCGA-AY-6386	66	female	Alive	M0	N1	III	T3	542	0	4.15616	High
246	TCGA-AY-A54L	74	female	Alive	M0	N0	I	T2	525	0	3.83987	High
247	TCGA-AY-A69D	55	female	Alive	M0	N0	II	T3	543	0	4.02018	High
248	TCGA-AY-A71X	54	female	Alive	M0	N0	I	T2	588	0	3.38704	Low
249	TCGA-AY-A8YK	44	male	Alive	M1	N2	IV	T3	573	0	3.61951	Low
250	TCGA-AZ-4308	47	female	Alive	M0	N1	III	T3	3324	0	2.56119	Low
251	TCGA-AZ-4313	51	female	Alive	M0	N0	I	T1	2310	0	3.40334	Low
252	TCGA-AZ-4315	61	male	Alive	M0	N0	II	T3	1776	0	4.46579	High
253	TCGA-AZ-4323	37	male	Dead	M1	N2	IV	T4	43	1	3.77588	Low
254	TCGA-AZ-4614	71	female	Dead	M1	N1	IV	T4	172	1	3.72876	Low
255	TCGA-AZ-4615	84	male	Alive	M0	N1	III	T3	1002	0	4.24692	High
256	TCGA-AZ-4616	82	female	Dead	M1	N2	IV	T3	156	1	3.47117	Low
257	TCGA-AZ-4682	61	male	Dead	M1	N0	IV	T3	680	1	4.47212	High
258	TCGA-AZ-4684	49	male	Alive	M1	N2	IV	T3	1977	0	4.68121	High
259	TCGA-AZ-5403	43	male	Dead	M0	N0	II	T3	1910	1	3.60702	Low
260	TCGA-AZ-5407	51	female	Alive	M0	N0	I	T1	2683	0	4.15209	High
261	TCGA-AZ-6598	77	female	Dead	M0	N0	II	T3	1503	1	4.10298	High
262	TCGA-AZ-6599	72	male	Dead	M0	N0	I	T2	206	1	3.40603	Low
263	TCGA-AZ-6600	64	male	Dead	M1	N1	IV	T4	368	1	3.63983	Low
264	TCGA-AZ-6601	68	male	Dead	M0	N0	II	T3	3042	1	4.52502	High
265	TCGA-AZ-6605	77	male	Dead	M0	N1	III	T4	159	1	3.55465	Low
266	TCGA-AZ-6606	81	male	Dead	M1	N2	IV	T4	357	1	3.95369	High
267	TCGA-AZ-6607	69	male	Dead	M1	N2	IV	T4	97	1	2.7316	Low
268	TCGA-AZ-6608	55	female	Dead	M0	N1	III	T2	59	1	3.72184	Low
269	TCGA-CA-5254	42	female	Alive	M0	N0	II	T3	386	0	2.99976	Low
270	TCGA-CA-5255	45	male	Alive	M0	N0	II	T3	376	0	3.23995	Low
271	TCGA-CA-5256	54	female	Alive	M0	N0	II	T3	379	0	3.91878	High
272	TCGA-CA-5796	52	female	Alive	M0	N0	II	T3	377	0	3.5665	Low
273	TCGA-CA-5797	56	male	Alive	M0	N0	II	T3	383	0	3.94971	High
274	TCGA-CA-6715	63	male	Alive	M0	N1	III	T3	383	0	4.21814	High
275	TCGA-CA-6716	65	male	Alive	M0	N0	II	T3	371	0	2.82501	Low
276	TCGA-CA-6717	57	male	Alive	M0	N0	II	T3	388	0	4.03165	High
277	TCGA-CA-6718	46	male	Dead	M0	N0	II	T3	306	1	4.54038	High
278	TCGA-CA-6719	77	male	Alive	M0	N0	II	T3	435	0	4.59911	High
279	TCGA-CK-4947	46	female	Alive	M0	N1	III	T4	534	0	4.49369	High
280	TCGA-CK-4948	45	female	Alive	M0	N1	III	T3	4502	0	3.97131	High
281	TCGA-CK-4950	68	female	Alive	M0	N1	III	T3	2599	0	3.85377	High
282	TCGA-CK-4951	79	female	Dead	M0	N0	II	T3	2134	1	3.58786	Low
283	TCGA-CK-4952	48	female	Alive	M0	N2	III	T4	475	0	4.59632	High
284	TCGA-CK-5912	81	male	Dead	M0	N0	I	T2	1493	1	4.41611	High
285	TCGA-CK-5913	58	female	Alive	M0	N0	II	T3	1561	0	4.38628	High
286	TCGA-CK-5914	81	male	Alive	M0	N1	III	T3	669	0	4.4098	High
287	TCGA-CK-5915	63	male	Alive	M0	N0	I	T2	0	0	4.47468	High
288	TCGA-CK-5916	71	female	Dead	M0	N0	I	T1	643	1	4.44154	High
289	TCGA-CK-6746	84	female	Alive	M0	N0	II	T4	0	0	3.94785	High
290	TCGA-CK-6747	87	female	Alive	M0	N0	II	T3	820	0	4.0714	High
291	TCGA-CK-6748	45	female	Alive	M1	N1	IV	T3	61	0	2.63618	Low
292	TCGA-CK-6751	88	female	Alive	M0	N0	I	T2	518	0	4.24023	High
293	TCGA-CM-4743	69	male	Alive	M0	N0	II	T3	701	0	3.57036	Low
294	TCGA-CM-4744	69	male	Alive	M0	N0	I	T2	609	0	4.06558	High
295	TCGA-CM-4746	61	male	Alive	M0	N0	I	T2	1126	0	3.51112	Low
296	TCGA-CM-4747	47	male	Alive	M1	N1	IV	T4	761	0	2.15005	Low
297	TCGA-CM-4748	53	male	Alive	M0	N1	III	T4	792	0	3.05942	Low
298	TCGA-CM-4750	34	female	Alive	M0	N1	III	T1	244	0	3.78127	Low
299	TCGA-CM-4751	62	male	Alive	M0	N1	III	T3	822	0	3.95294	High
300	TCGA-CM-4752	58	male	Alive	M0	N0	II	T3	396	0	4.09926	High
301	TCGA-CM-5341	82	female	Alive	M0	N1	III	T2	884	0	3.61346	Low
302	TCGA-CM-5344	39	female	Alive	M0	N1	III	T3	670	0	3.06291	Low
303	TCGA-CM-5348	72	male	Alive	M0	N1	III	T3	699	0	2.97267	Low
304	TCGA-CM-5349	68	female	Alive	M0	N0	II	T3	915	0	3.5398	Low
305	TCGA-CM-5860	44	male	Alive	M0	N0	II	T3	974	0	3.76134	Low
306	TCGA-CM-5861	63	female	Alive	M0	N0	II	T3	457	0	4.00096	High
307	TCGA-CM-5862	80	male	Dead	M1	N1	IV	T3	153	1	3.84311	High
308	TCGA-CM-5863	60	female	Alive	M0	N1	III	T3	457	0	3.23153	Low
309	TCGA-CM-5864	60	male	Alive	M0	N0	I	T2	457	0	3.64817	Low
310	TCGA-CM-5868	59	female	Alive	M1	N1	IV	T4	518	0	3.95645	High
311	TCGA-CM-6161	36	female	Alive	M0	N0	I	T2	457	0	3.94187	High
312	TCGA-CM-6162	48	female	Alive	M0	N1	III	T3	365	0	4.23058	High
313	TCGA-CM-6163	74	male	Alive	M0	N0	I	T1	427	0	3.75142	Low
314	TCGA-CM-6164	46	female	Alive	M0	N0	II	T3	883	0	3.64655	Low
315	TCGA-CM-6165	74	male	Alive	M0	N0	II	T3	488	0	4.12143	High
316	TCGA-CM-6166	48	female	Alive	M0	N0	I	T2	669	0	3.64579	Low
317	TCGA-CM-6167	57	female	Alive	M0	N2	III	T3	456	0	3.21601	Low
318	TCGA-CM-6168	84	female	Alive	M0	N0	II	T3	395	0	4.23186	High
319	TCGA-CM-6169	67	male	Alive	M0	N0	II	T3	396	0	3.64877	Low
320	TCGA-CM-6170	73	female	Alive	M0	N0	I	T2	457	0	3.69182	Low
321	TCGA-CM-6171	77	female	Alive	M0	N0	I	T2	427	0	3.96559	High
322	TCGA-CM-6172	70	female	Alive	M0	N1	III	T3	335	0	4.05099	High
323	TCGA-CM-6674	39	male	Alive	M0	N0	II	T3	394	0	4.0656	High
324	TCGA-CM-6675	35	male	Alive	M1	N2	IV	T3	397	0	3.85341	High
325	TCGA-CM-6676	82	male	Alive	M0	N0	I	T2	337	0	3.90321	High
326	TCGA-CM-6677	75	female	Alive	M0	N0	II	T3	337	0	4.27834	High
327	TCGA-CM-6678	63	female	Alive	M1	N1	IV	T4	335	0	3.34743	Low
328	TCGA-CM-6679	58	male	Alive	M0	N0	II	T3	306	0	3.29801	Low
329	TCGA-CM-6680	78	female	Alive	M0	N2	III	T3	366	0	3.78537	Low
330	TCGA-D5-5538	60	female	Dead	M0	N1	III	T3	1661	1	3.68241	Low
331	TCGA-D5-5539	60	male	Alive	M0	N1	III	T3	596	0	3.90193	High
332	TCGA-D5-5540	73	male	Alive	M0	N0	II	T3	1706	0	3.61423	Low
333	TCGA-D5-5541	63	male	Alive	M0	N1	III	T3	1701	0	4.21046	High
334	TCGA-D5-6529	69	male	Alive	M0	N0	II	T3	614	0	3.93545	High
335	TCGA-D5-6530	53	male	Alive	M0	N0	I	T2	621	0	3.92282	High
336	TCGA-D5-6531	75	male	Alive	M0	N0	II	T3	540	0	3.96071	High
337	TCGA-D5-6532	61	male	Alive	M0	N0	II	T3	555	0	4.26947	High
338	TCGA-D5-6533	68	female	Alive	M0	N0	II	T4	775	0	3.53894	Low
339	TCGA-D5-6534	62	female	Alive	M0	N0	II	T3	1316	0	2.77207	Low
340	TCGA-D5-6535	80	female	Alive	M0	N1	III	T3	460	0	3.42306	Low
341	TCGA-D5-6536	73	male	Alive	M0	N0	II	T3	543	0	2.85492	Low
342	TCGA-D5-6537	64	male	Dead	M0	N1	III	T3	146	1	4.17036	High
343	TCGA-D5-6538	79	female	Alive	M0	N2	III	T3	521	0	3.8444	High
344	TCGA-D5-6539	45	female	Alive	M0	N0	II	T3	380	0	3.88622	High
345	TCGA-D5-6540	66	male	Alive	M0	N0	I	T2	491	0	4.22143	High
346	TCGA-D5-6541	49	male	Alive	M0	N0	II	T3	474	0	3.79901	High
347	TCGA-D5-6898	51	female	Alive	M0	N0	I	T2	229	0	4.45365	High
348	TCGA-D5-6920	77	female	Alive	M0	N0	II	T3	377	0	3.96069	High
349	TCGA-D5-6922	76	male	Alive	M0	N1	III	T3	308	0	4.546	High
350	TCGA-D5-6923	57	male	Alive	M0	N0	I	T2	378	0	4.49889	High
351	TCGA-D5-6924	68	male	Alive	M0	N0	II	T3	435	0	3.48968	Low
352	TCGA-D5-6926	65	male	Alive	M0	N1	III	T4	275	0	3.70819	Low
353	TCGA-D5-6927	34	male	Alive	M0	N0	II	T3	287	0	3.9068	High
354	TCGA-D5-6928	80	male	Alive	M0	N0	II	T3	354	0	3.6205	Low
355	TCGA-D5-6929	49	female	Alive	M1	N1	IV	T3	408	0	3.44067	Low
356	TCGA-D5-6930	67	male	Alive	M0	N0	II	T3	406	0	4.01698	High
357	TCGA-D5-6931	77	male	Alive	M0	N2	III	T4	365	0	4.37621	High
358	TCGA-D5-6932	69	male	Alive	M0	N0	II	T3	346	0	3.39906	Low
359	TCGA-D5-7000	79	female	Alive	M0	N0	I	T2	312	0	4.11746	High
360	TCGA-DM-A0X9	71	female	Alive	M0	N0	II	T3	3641	0	3.7458	Low
361	TCGA-DM-A0XD	65	male	Dead	M0	N0	II	T3	743	1	3.79467	High
362	TCGA-DM-A0XF	68	female	Dead	M0	N2	III	T3	1162	1	3.2273	Low
363	TCGA-DM-A1D0	79	female	Alive	M0	N0	II	T3	3974	0	3.81358	High
364	TCGA-DM-A1D4	80	male	Dead	M0	N0	II	T3	2821	1	3.12236	Low
365	TCGA-DM-A1D6	88	male	Dead	M0	N0	II	T3	570	1	3.23509	Low
366	TCGA-DM-A1D7	82	male	Dead	M0	N0	II	T3	405	1	3.769	Low
367	TCGA-DM-A1D9	67	female	Alive	M0	N0	II	T3	4270	0	3.9608	High
368	TCGA-DM-A1DA	71	female	Dead	M0	N2	III	T3	228	1	3.9341	High
369	TCGA-DM-A1DB	68	male	Dead	M0	N0	II	T3	1348	1	3.43611	Low
370	TCGA-DM-A1HA	82	male	Alive	M0	N2	III	T3	2600	0	3.62522	Low
371	TCGA-DM-A1HB	75	male	Alive	M0	N1	III	T3	4126	0	4.10177	High
372	TCGA-DM-A280	70	female	Dead	M0	N0	II	T3	236	1	3.87014	High
373	TCGA-DM-A282	60	female	Alive	M0	N0	II	T3	4233	0	3.29403	Low
374	TCGA-DM-A285	71	female	Dead	M1	N2	IV	T3	179	1	4.14317	High
375	TCGA-DM-A288	68	male	Dead	M0	N2	III	T3	427	1	3.17798	Low
376	TCGA-DM-A28A	78	male	Dead	M0	N2	III	T3	805	1	3.25192	Low
377	TCGA-DM-A28C	74	male	Dead	M0	N0	II	T3	2475	1	3.33713	Low
378	TCGA-DM-A28E	72	female	Alive	M0	N0	II	T3	3648	0	4.01222	High
379	TCGA-DM-A28F	73	male	Dead	M0	N1	III	T3	1094	1	3.77209	Low
380	TCGA-DM-A28G	75	male	Dead	M0	N0	II	T3	1849	1	3.6484	Low
381	TCGA-DM-A28H	50	male	Alive	M0	N2	III	T3	3561	0	4.74671	High
382	TCGA-DM-A28K	75	male	Alive	M0	N0	II	T3	2988	0	3.97201	High
383	TCGA-DM-A28M	63	male	Alive	M0	N0	II	T3	2895	0	4.05924	High
384	TCGA-F4-6459	61	female	Dead	M0	N2	III	T3	262	1	3.39991	Low
385	TCGA-F4-6460	51	female	Dead	M0	N1	III	T3	972	1	2.51475	Low
386	TCGA-F4-6461	41	female	Dead	M0	N2	III	T4	338	1	3.26353	Low
387	TCGA-F4-6463	51	male	Alive	M0	N0	II	T3	1087	0	3.69948	Low
388	TCGA-F4-6569	60	male	Alive	M0	N0	I	T2	1087	0	3.63487	Low
389	TCGA-F4-6570	78	female	Dead	M0	N0	II	T3	188	1	3.6795	Low
390	TCGA-F4-6703	64	male	Alive	M0	N0	II	T3	1456	0	3.21628	Low
391	TCGA-F4-6704	60	male	Alive	M0	N2	III	T3	47	0	3.20126	Low
392	TCGA-F4-6805	58	female	Alive	M0	N0	II	T3	1047	0	3.99793	High
393	TCGA-F4-6806	59	female	Alive	M0	N0	I	T2	1260	0	3.16466	Low
394	TCGA-F4-6807	51	female	Alive	M0	N2	III	T3	1309	0	3.88056	High
395	TCGA-F4-6808	54	female	Alive	M0	N0	I	T1	1024	0	3.74908	Low
396	TCGA-F4-6809	52	female	Dead	M1	N1	IV	T3	403	1	2.91503	Low
397	TCGA-F4-6854	77	female	Alive	M0	N0	II	T3	16	0	3.49873	Low
398	TCGA-F4-6855	70	female	Alive	M0	N0	II	T3	1442	0	3.0243	Low
399	TCGA-F4-6856	45	male	Alive	M0	N0	I	T2	1074	0	3.69224	Low
400	TCGA-G4-6293	49	female	Alive	M0	N1	III	T3	4051	0	3.63744	Low
401	TCGA-G4-6294	75	male	Dead	M1	N1	IV	T3	858	1	3.67247	Low
402	TCGA-G4-6295	70	female	Alive	M0	N0	II	T3	254	0	4.38739	High
403	TCGA-G4-6297	55	female	Alive	M1	N2	IV	T3	2506	0	3.30143	Low
404	TCGA-G4-6298	90	male	Dead	M0	N1	III	T4	0	1	2.95654	Low
405	TCGA-G4-6299	69	male	Alive	M0	N2	III	T3	2268	0	3.67814	Low
406	TCGA-G4-6302	90	female	Dead	M0	N0	II	T3	0	1	3.23176	Low
407	TCGA-G4-6303	54	female	Dead	M1	N1	IV	T3	2003	1	3.84776	High
408	TCGA-G4-6304	66	female	Alive	M0	N0	II	T4	1631	0	3.63907	Low
409	TCGA-G4-6306	71	male	Alive	M0	N0	I	T2	1359	0	3.43237	Low
410	TCGA-G4-6307	37	female	Alive	M0	N1	III	T3	1674	0	3.62217	Low
411	TCGA-G4-6309	40	female	Alive	M0	N1	III	T3	2600	0	4.65023	High
412	TCGA-G4-6310	69	male	Alive	M0	N1	III	T3	1935	0	3.43821	Low
413	TCGA-G4-6311	80	male	Alive	M0	N1	III	T3	1199	0	3.84799	High
414	TCGA-G4-6314	76	female	Alive	M1	N2	IV	T3	1093	0	3.38927	Low
415	TCGA-G4-6315	66	male	Alive	M1	N1	IV	T3	1883	0	4.01446	High
416	TCGA-G4-6317	51	female	Alive	M0	N2	III	T3	1095	0	3.22231	Low
417	TCGA-G4-6320	73	male	Alive	M0	N1	III	T3	804	0	3.40198	Low
418	TCGA-G4-6321	60	female	Alive	M0	N1	III	T2	672	0	2.19824	Low
419	TCGA-G4-6322	65	male	Alive	M0	N1	III	T3	792	0	3.89644	High
420	TCGA-G4-6323	50	male	Alive	M0	N0	I	Tis	419	0	3.35623	Low
421	TCGA-G4-6586	73	female	Alive	M0	N0	II	T3	1089	0	3.88862	High
422	TCGA-G4-6588	58	female	Alive	M0	N0	II	T3	796	0	4.53876	High
423	TCGA-G4-6625	77	female	Alive	M0	N0	II	T3	2792	0	3.53689	Low
424	TCGA-G4-6626	90	male	Dead	M0	N0	II	T3	1	1	3.55486	Low
425	TCGA-G4-6627	84	male	Alive	M0	N0	II	T3	2175	0	3.15128	Low
426	TCGA-G4-6628	78	male	Alive	M0	N0	I	T2	2424	0	4.0472	High
427	TCGA-NH-A50T	68	female	Alive	M0	N0	II	T3	553	0	4.32628	High
428	TCGA-NH-A50U	42	male	Dead	M1	N0	IV	T4	334	1	3.41273	Low
429	TCGA-NH-A50V	69	male	Alive	M0	N2	III	T3	588	0	3.15656	Low
430	TCGA-NH-A5IV	90	female	Alive	M0	N0	II	T3	0	0	4.12042	High
431	TCGA-NH-A6GA	58	male	Dead	M0	N2	III	T4	302	1	3.42294	Low
432	TCGA-NH-A6GB	71	female	Alive	M0	N2	III	T3	476	0	4.31747	High
433	TCGA-NH-A6GC	66	female	Alive	M1	N1	IV	T4	389	0	3.01947	Low
434	TCGA-NH-A8F7	53	female	Alive	M0	N0	II	T3	543	0	3.64684	Low
435	TCGA-NH-A8F8	79	male	Dead	M1	N2	IV	T4	511	1	2.83136	Low
436	TCGA-QG-A5YV	64	female	Alive	M0	N1	III	T4	1301	0	3.90126	High
437	TCGA-QG-A5YW	55	female	Alive	M0	N2	III	T3	896	0	3.90543	High
438	TCGA-QG-A5YX	61	female	Alive	M0	N0	II	T3	1003	0	4.41028	High
439	TCGA-QG-A5Z1	71	male	Dead	M0	N1	III	T3	256	1	3.69278	Low
440	TCGA-QG-A5Z2	61	male	Alive	M0	N0	I	T2	952	0	3.94307	High
441	TCGA-QL-A97D	84	female	Alive	M0	N0	I	T2	666	0	3.77287	Low
442	TCGA-RU-A8FL	51	male	Alive	M0	N2	III	T3	1177	0	4.39608	High
443	TCGA-SS-A7HO	44	female	Alive	M0	N0	II	T4	1829	0	3.92508	High
444	TCGA-T9-A92H	82	male	Alive	M0	N0	II	T3	362	0	3.79449	High
445	TCGA-WS-AB45	52	female	Alive	M0	N0	II	T3	2130	0	3.24678	Low
